# Supplementary material for: Marine reservoir ages for coastal West Africa
Source: Copernicus journal article supplement (doi:10.5194/gchron-5-345-2023), 2023-08-17
Supplement: Supplementary file 1 [file gchron-5-345-2023-supplement.zip]

Archive with 2 entries (2 files):
- gchron-5-345-2023-supplement-title-page.pdf
- TableS1_revised-version.xlsx
