# Supplementary material for: Marine reservoir ages for coastal West Africa
Source: Copernicus journal article supplement (doi:10.5194/gchron-5-345-2023), 2023-08-17
Supplement: Supplementary file 1 [file gchron-5-345-2023-supplement.zip › gchron-5-345-2023-supplement-title-page.pdf]

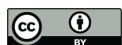

## *Supplement of*

# **Marine reservoir ages for coastal West Africa**

**Guillaume Soulet et al.**

*Correspondence to:* Guillaume Soulet (gsoulet@ifremer.fr)

- [gchron-5-345-2023-supplement-title-page.pdf](#)
- [TableS1\\_revised-version.xlsx](#)

The copyright of individual parts of the supplement might differ from the article licence.
