# Supplementary material for: Marine reservoir ages for coastal West Africa
Source: Copernicus journal article supplement (doi:10.5194/gchron-5-345-2023), 2023-08-17
Supplement: Supplementary file 1 [file TableS1_revised-version.xlsx]

## Sheet: Table S1
Table 1. AMS 14C dates of modern pre-bomb bivalve shell samples from the coast of West Africa, and their carbon and oxygen stable isotopes and reservoir ages
Museum #	Lab #	Species	Location	Country	Latitude (°)	Longitude (°)	Collection date (AD)	δ13C (‰)	δ18O (‰)	F14C	Err	14C age (14C yrs BP)	Err	ΔR (14C yrs)	Err	R (14C yrs)*	Err	Ref
MNHN-IM-2022-4615	SacA-68834	Ostrea stentina	Mohammedia	Marocco	33.71	-7.37	1921	1.18961	-0.237415	0.941777	0.0020949	481.872	17.8489	-122	66	342	21	This study
MNHN-IM-2022-4609	SacA-68828	Ostrea stentina	El Jadida, beach	Marocco	33.25	-8.49	1909-10-26	0.71004	-0.448421	0.903298	0.0019759	816.982	17.5524	209	66	701	21	This study1
MNHN-IM-2022-4608	SacA-68827	Ostrea stentina	Lagoon of Sidi Moussa south of El Jadida	Marocco	32.98	-8.75	1924	-0.483845	-0.133734	0.876589	0.0020642	1058.08	18.8939	454	66	912	21	This study1
MNHN-IM-2022-4612	SacA-68831	Ostrea stentina	Noudhibou, Pointe Chacal	Mauritania	20.91	-17.04	1948	2.2799	1.02228	0.938058	0.0019578	513.662	16.748	-89	62	319	20	This study
MNHN-IM-2022-4599	SacA-68811	Bucardium ringens	Nouadhibou	Mauritania	20.88	-17.04	1908	0.383895	0.681638	0.89812	0.0019695	863.16	17.5964	255	66	750	21	This study1
MNHN-IM-2022-4610	SacA-68829	Ostrea stentina	Bay of Cansado	Mauritania	20.88	-17.04	ca. 1910-1911	2.08698	-0.328193	0.937834	0.0019593	515.576	16.7648	-91	66	397	20	This study
–	AA-70001	Anomia ephippium	Noudhibou (Port-Etienne)	Mauritania	20.88	-17.04	1912	–	–	0.938836	0.00361606	507	31	-99	71	388	32	Ndeye (2008)
–	AA-70007	Tellina strigosa	Noudhibou (Port-Etienne)	Mauritania	20.88	-17.04	1908	–	–	0.933243	0.00359452	555	31	-53	71	442	33	Ndeye (2008)
–	AA-70008	Felania circularis	El Mamghar	Mauritania	19.35	-16.52	1908-02-27	–	–	0.942231	0.00351229	478	30	-130	71	365	32	Ndeye (2008)
–	AA-70002	Modiolus lulat	El Mamghar	Mauritania	19.35	-16.52	1908-02-28	–	–	0.935336	0.00348659	537	30	-71	71	424	32	Ndeye (2008)
MNHN-IM-2022-4603	SacA-68815	Donax rugosus	Ndiago, beach	Mauritania	16.17	-16.51	1908-01-21	0.678905	0.386487	0.937577	0.0021678	517.779	18.5519	-90	67	405	21	This study
MNHN-IM-2022-4607	SacA-68819	Donax rugosus	Saint Louis	Senegal	16.02	-16.51	Dec. 1901	1.28547	0.0584955	0.931022	0.0021109	574.14	18.1926	-38	66	479	21	This study
MNHN-IM-2022-4592	SacA-68824	Senilia senilis	Dakar, backwaters of the "Marigot de Hann"	Senegal	14.74	-17.39	May 1908	-0.294899	0.226712	0.932701	0.002001	559.664	17.2154	-48	66	447	20	This study
–	GifA-100709	Patella intermedia	Dakar, Almadies	Senegal	14.74	-17.53	1939	–	–	0.932082	0.00578356	565	50	-38	79	399	51	Ndeye (2008)
MNHN-IM-2022-4598	SacA-68810	Bucardium ringens	Dakar, Bay of Hann at low tide	Senegal	14.71	-17.42	Apr. 1908	0.683253	0.0128628	0.924745	0.0019143	628.484	16.6118	20	66	515	20	This study
MNHN-IM-2022-4606	SacA-68818	Donax rugosus	Dakar, Bay of Hann	Senegal	14.71	-17.42	Apr. 1908	0.326025	-0.354895	0.93656	0.0021585	526.498	18.4924	-82	66	413	21	This study
MNHN-IM-2022-4616	SacA-68835	Ostrea stentina	Dakar, beach of Hann, posts of the pontoon	Senegal	14.71	-17.42	1947	1.56493	0.0383935	0.935061	0.0021606	539.364	18.5401	-64	63	346	22	This study
–	AA-70013	Mactra glabatra	Rufisque	Senegal	14.71	-17.27	1908-04-03	–	–	0.920894	0.00354696	662	31	54	71	546	33	Ndeye (2008)
–	AA-70017	Ostrea stentina	Rufisque	Senegal	14.71	-17.27	1909-04-03	–	–	0.924225	0.00355979	633	31	25	71	517	33	Ndeye (2008)
MNHN-IM-2022-4593	SacA-68825	Senilia senilis	Dakar, Bay of Hann, Pointe Bel Air, beach at low tide	Senegal	14.7	-17.42	1909-12-01	0.0720318	-0.575615	0.934566	0.0020496	543.613	17.5979	-64	66	428	21	This study
–	AA-70015	Venus rosalina	Gorée	Senegal	14.36	-17.37	1916	–	–	0.92342	0.00355668	640	31	35	70	514	33	Ndeye (2008)
MNHN-IM-2022-4601	SacA-68813	Bucardium ringens	Los Islands, Roume Island at low tide	Republic of Guinea	9.46	-13.79	1909-12-20	-0.399107	-1.94371	0.898794	0.0043273	857.131	38.5826	249	75	741	40	This study1
MNHN-IM-2022-4618	SacA-68820	Pseudochama gryphina	Los Islands, Tamara Island	Republic of Guinea	9.46	-13.83	ca. 1909-1910	1.52337	-0.722459	0.939474	0.0021718	501.542	18.5486	-105	67	384	21	This study
MNHN-IM-2022-4611	SacA-68830	Ostrea stentina	Near Cape Saint Ann	Sierra Leone	7.56	-12.94	1912	1.0427	0.123328	0.943865	0.0021117	464.086	17.9521	-142	66	345	20	This study
MNHN-IM-2022-4591	SacA-68823	Senilia senilis	Ahémé Lake	Benin	6.42	1.96	Feb. 1910	-4.75885	-0.304189	0.949803	0.0021471	413.708	18.1387	-193	66	296	21	This study2
MNHN-IM-2022-4600	SacA-68812	Bucardium ringens	Cotonou, Sea at a water depth of 20-25 meters	Benin	6.33	2.39	Febr. 1910	0.26078	-1.12998	0.927335	0.002028	606.009	17.5483	-1	66	488	21	This study
MNHN-IM-2022-4602	SacA-68814	Bucardium ringens	La Bouche du Roi, Grand Popo, beach	Benin	6.29	1.92	Feb. 1910	0.250998	-2.02163	0.936471	0.0019783	527.262	16.9519	-80	66	409	20	This study
MNHN-IM-2022-4595	SacA-68807	Bucardium ringens	Grand Bassam, beach	Ivory Coast	5.19	-3.73	ca. 1909-1910	0.28517	-0.848731	0.938839	0.0021036	506.975	17.9789	-100	66	389	21	This study
MNHN-IM-2022-4597	SacA-68809	Bucardium ringens	Jacqueville, beach	Ivory Coast	5.19	-4.42	1910-01-19	0.03	0.97	0.883531	0.0019806	994.717	17.9873	388	66	877	21	This study1
MNHN-IM-2022-4613	SacA-68832	Ostrea stentina	Port-Gentil	Gabon	-0.71	8.79	1948	2.63548	-0.385375	0.940052	0.0021959	496.602	18.7427	-106	63	329	21	This study
MNHN-IM-2022-4614	SacA-68833	Ostrea stentina	Loango	Republic of Congo	-4.66	11.8	1890	1.3838	-0.879416	0.931424	0.0021554	570.672	18.5676	-53	67	427	20	This study
MNHN-IM-2022-4604	SacA-68816	Donax rugosus	Pointe Noire	Republic of Congo	-4.76	11.84	18/12/1936 - 16/04/1937	0.837226	-1.78022	0.945924	0.0021069	446.58	17.8724	-156	64	289	20	This study
MNHN-IM-2022-4590	SacA-68822	Senilia senilis	Cabinda	Angola	-5.55	12.2	ca. 1885-1887	-1.14582	-0.839795	0.929832	0.0020034	584.409	17.2891	-44	66	438	19	This study
MNHN-IM-2022-4594	SacA-68826	Senilia senilis	Cabinda	Angola	-5.55	12.2	1921-06-06	-3.10647	0.481836	0.935484	0.0022051	535.727	18.9129	-68	66	405	21	This study
MNHN-IM-2022-4589	SacA-68821	Senilia senilis	Luanda, beach	Angola	-8.78	13.27	1910-05-18	-0.164048	-0.470113	0.935277	0.0021755	537.512	18.6635	-69	67	411	21	This study
MNHN-IM-2022-4605	SacA-68817	Donax rugosus	Luanda, beach	Angola	-8.82	13.21	1910-05-18	0.824908	0.591168	0.936407	0.0021023	527.812	18.0144	-79	66	401	20	This study
MNHN-IM-2022-4596	SacA-68808	Bucardium ringens	Lobito, Bay of Lobito, near the peninsula	Angola	-12.33	13.56	Jun. 1910	1.50581	0.491693	0.928565	0.0020198	595.363	17.4543	-12	66	468	19	This study
MNHN-IM-2022-4617	SacA-68836	Ostrea stentina	Moçâmedes	Angola	-15.18	12.14	1910	1.747	-0.88511	0.931714	0.0020604	568.168	17.7446	-39	66	441	20	This study
* samples from northern hemisphere were calculated using IntCal20 (reimer et al., 2020) and those from southern hemisphere using SHcal20 (Hogg et al., 2020)
1excluded from the weighted mean value as possible outliers
2excluded from the weighted mean value as part of the Ahémé Lake, which is probably not representative of the Atlantic Ocean
